# Supplementary material for: Artesunate Switches Monocytes to an Inflammatory Phenotype with the Ability to Kill Leukemic Cells
Source: PubMed Central journal article supplement (PMC7827848; doi:10.3390/ijms22020608), 2021-01-09
Supplement: ijms-22-00608-s001.pdf [file ijms-22-00608-s001.pdf]

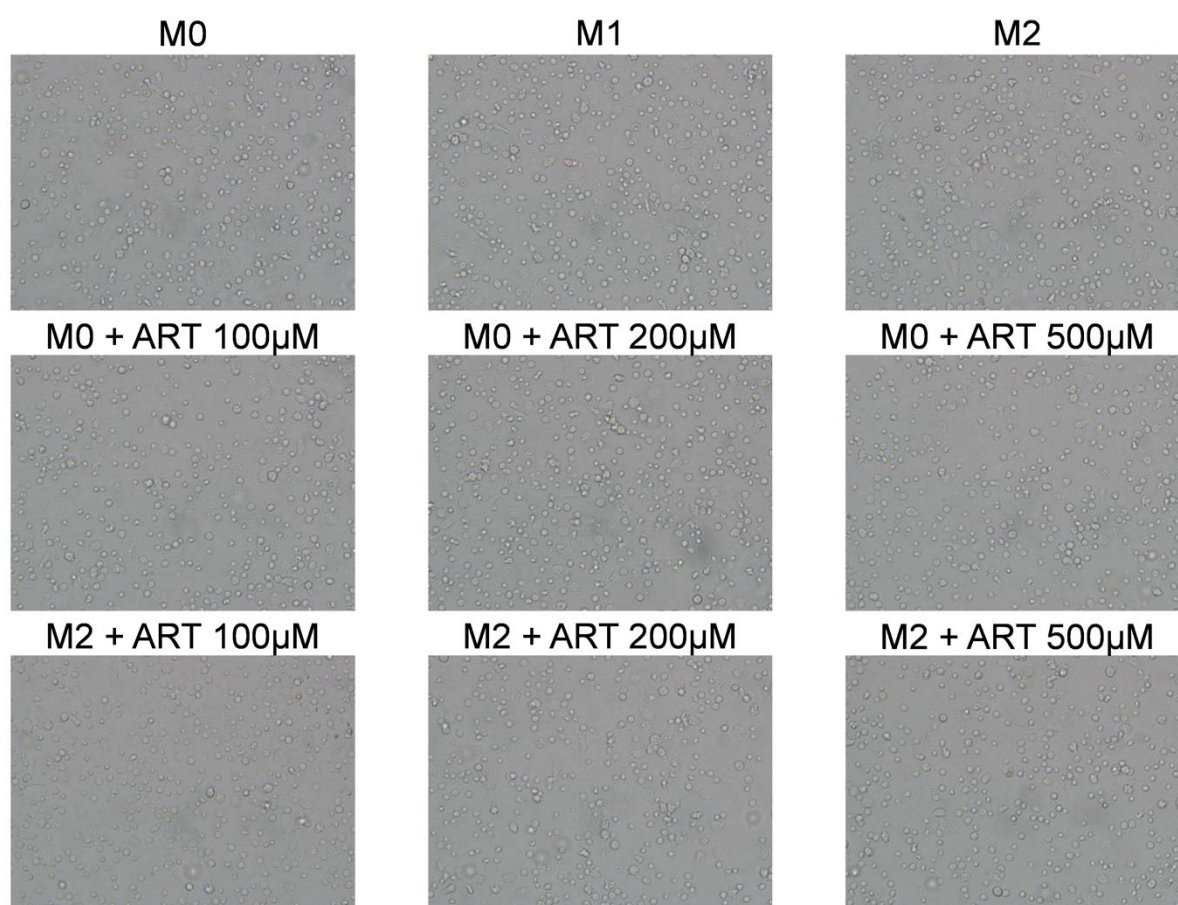

**Supplementary Figure S1.** Representative light microscopy images of monocytes treated with LPS (10 ng/mL) for M1-type monocytes, IL-4 (20 ng/mL) for M2-type monocytes and both M0 and M2-type monocytes treated with increasing doses of ART.

**Supplementary Table S1.** List of antibodies and antibody dilutions used in the described experiments.

| Antibody     | Technique | Reference  | Manufacturers   | Dilution |
|--------------|-----------|------------|-----------------|----------|
| CD14-FITC    | FC        | 301804     | Biologend       | 1:40     |
| CD16-APC     | FC        | 17-0168-42 | eBioscience     | 1:250    |
| CD80-PE      | FC        | MHCD8004   | Invitrogen      | 1:50     |
| HLA-DR-PerCP | FC        | MHLDR31    | Invitrogen      | 1:33     |
| CD163-PerCP  | FC        | 326512     | Biologend       | 1:33     |
| CD206-APC    | FC        | 321110     | Biologend       | 1:33     |
| p-JAK2       | WB        | #3771      | Cell Signalling | 1:1000   |
| p-STAT3      | WB        | sc-7993    | Santa Cruz      | 1:1000   |
| STAT3        | WB        | ab5073     | Abcam           | 1:1000   |
| NF-kB p65    | WB        | #4764      | Cell Signalling | 1:1000   |

|                      |    |           |                 |        |
|----------------------|----|-----------|-----------------|--------|
| p-NF-kB p65          | WB | #3033     | Cell Signalling | 1:1000 |
| CHOP                 | WB | #2895     | Cell Signalling | 1:1000 |
| ATF4                 | WB | #11815    | Cell Signalling | 1:1000 |
| p-eIF2 $\alpha$      | WB | #9721     | Cell Signalling | 1:1000 |
| IKK $\alpha$         | WB | #2682     | Cell Signalling | 1:1000 |
| IKK $\beta$          | WB | #8943     | Cell Signalling | 1:1000 |
| p-IKK $\alpha/\beta$ | WB | #2697     | Cell Signalling | 1:1000 |
| p-JNK                | WB | #4668     | Cell Signalling | 1:1000 |
| p-p38                | WB | sc-166182 | Santa Cruz      | 1:1000 |
| p-c-Jun              | WB | #2361     | Cell Signalling | 1:1000 |
| p-ERK                | WB | sc-7383   | Santa Cruz      | 1:1000 |

Legend: WB: Western Blot; FC: Flow Cytometry.
